# Supplementary material for: A metabolomic strategy based on integrating headspace gas chromatography-mass spectrometry and liquid chromatography-mass spectrometry to differentiate the five cultivars of Chrysanthemum flower
Source: Royal Society of Chemistry journal article supplement (doi:10.1039/c7ra13503c), 2018-01-01
Supplement: c7ra13503c1.pdf [file c7ra13503c1.pdf]

**A metabolomic strategy by integrating headspace gas chromatography-mass spectrometry and liquid chromatography-mass spectrometry to differentiate the five cultivars of *Chrysanthemum* flower**

Lin-Ning Zhang,<sup>a</sup> Long Wang,<sup>a</sup> Zi-Qi Shi<sup>\*b,c</sup>, Ping Li<sup>a</sup> and Hui-Jun Li<sup>\*a</sup>

<sup>a</sup>State Key Laboratory of Natural Medicines, China Pharmaceutical University, No. 24 Tongjia Lane, Nanjing, China

<sup>b</sup>Affiliated Hospital of Integrated Traditional Chinese and Western Medicine, Nanjing University of Chinese Medicine, Nanjing, China

<sup>c</sup>Jiangsu Province Academy of Traditional Chinese Medicine, Nanjing, China

(\*) Corresponding authors:

Prof. Shi, Key Laboratory of New Drug Delivery Systems of Chinese Materia Medica, Jiangsu Provincial Academy of Chinese Medicine, Nanjing 210028, China

Tel.: +86 25 85608672, fax: +86 25 85608672, E-mail: shiziqi@126.com

and

Prof. Li, State Key Laboratory of Natural Medicines, China Pharmaceutical University, No. 24 Tongjia Lane, Nanjing, China

Tel.: +86 25 8327 1379, fax: +86 25 8327 1379, E-mail: cpuli@163.com

**Fig. S1** Flowchart of the general strategy to differentiate and classify the five official *Chrysanthemum* flowers

**Fig. S2** Collected regions and the number of samples of *Chrysanthemum* flowers

**Fig. S3** The overlapping total ion current (TIC) chromatograms of QC samples from HSGC-MS (A) and UHPLC-QTOF/MS (B) analysis

**Fig. S4** The typical TIC chromatograms of BJ, CJ, GJ, HbJ and HJ by HSGC-MS.

**Fig. S5** The typical TIC chromatograms of BJ, CJ, GJ, HbJ and HJ by UHPLC-QTOF-MS in negative ion mode.

**Fig. S6** PCA scores plots of data of HSGC-MS and UHPLC-QTOF/MS from different normalization methods. Obviously, there were no obvious separation trends for groups of five FCs. A and B are plots of HSGC-MS and UHPLC-QTOF/MS data sets normalized by respective IS, C and D are plots of HSGC-MS and UHPLC-QTOF/MS normalized by total peak area.

**Fig. S7** The plot of response permutation testing,  $R^2=(0.0, 0.406)$ ,  $Q^2=(0.0, -0.290)$   
The criterions of validity have two important characteristics: the blue regression line of the  $Q^2$  (cum) points has a negative intercept, and all the permuted values ( $Q^2$  (cum) and  $R^2$  (cum)) to the right are higher than the original points to the left.

**Fig. S8** ROC analysis of the identified marker compounds in similar species of *Chrysanthemum* flowers with BJ-HJ, CJ-HbJ, GJ-HbJ and CJ-GJ.

**Table S1** Nine extracted ions in ten QC samples from HSGC-MS analysis

**Table S2** Nine extracted ions in eleven QC samples from UHPLC-QTOF/MS analysis

**Table S3** IS-1 in ten QC samples from HSGC-MS analysis

**Table S4** IS-2 in eleven QC samples from UHPLC-QTOF/MS analysis

**Table S5** ROC curve analysis of the identified marker compounds from CJ and GJ

**Table S6** ROC curve analysis of the identified marker compounds from CJ and HbJ

**Table S7** ROC curve analysis of the identified marker compounds from GJ and HbJ

**Table S8** ROC curve analysis of the identified marker compounds from HJ and BJ

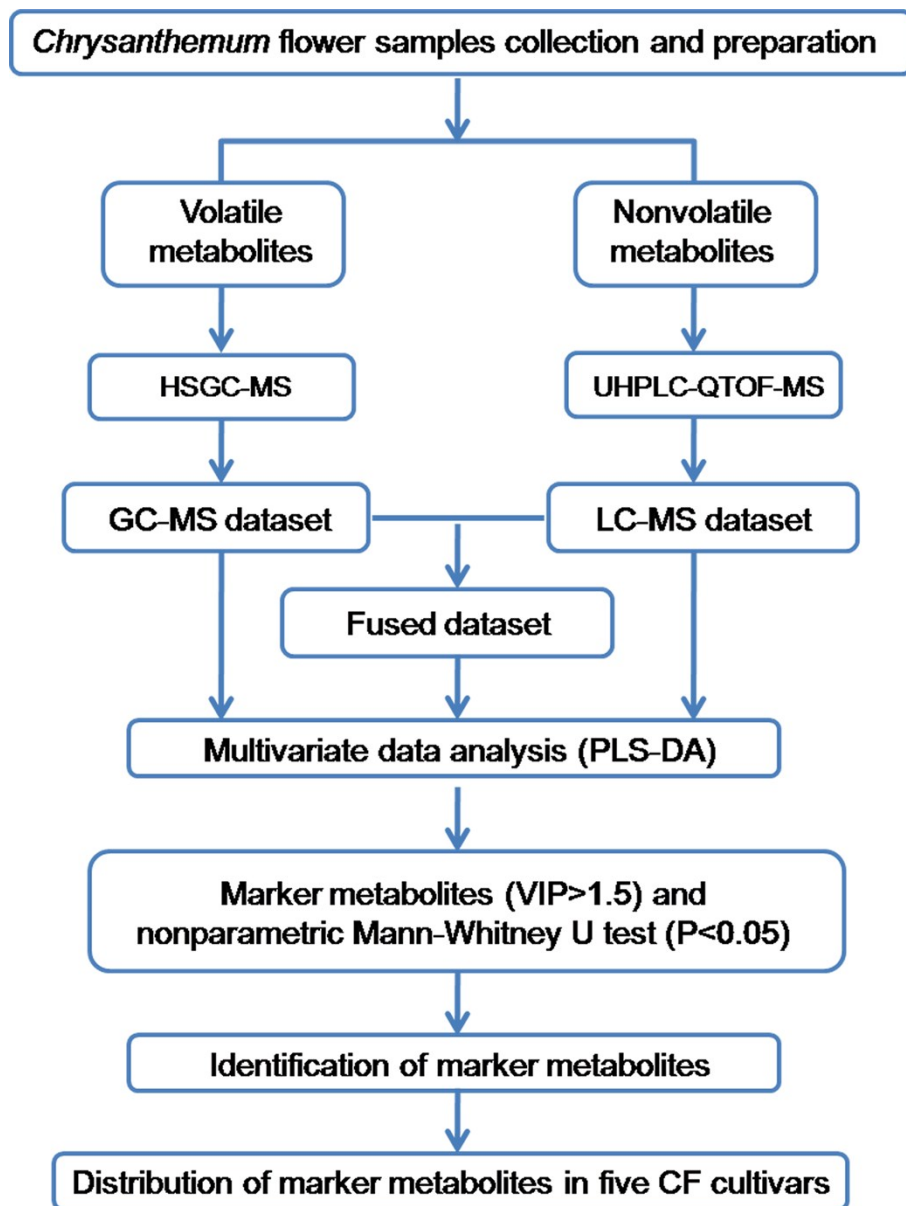

**Fig. S1** Flowchart of the general strategy to differentiate and classify the five official *Chrysanthemum* flowers

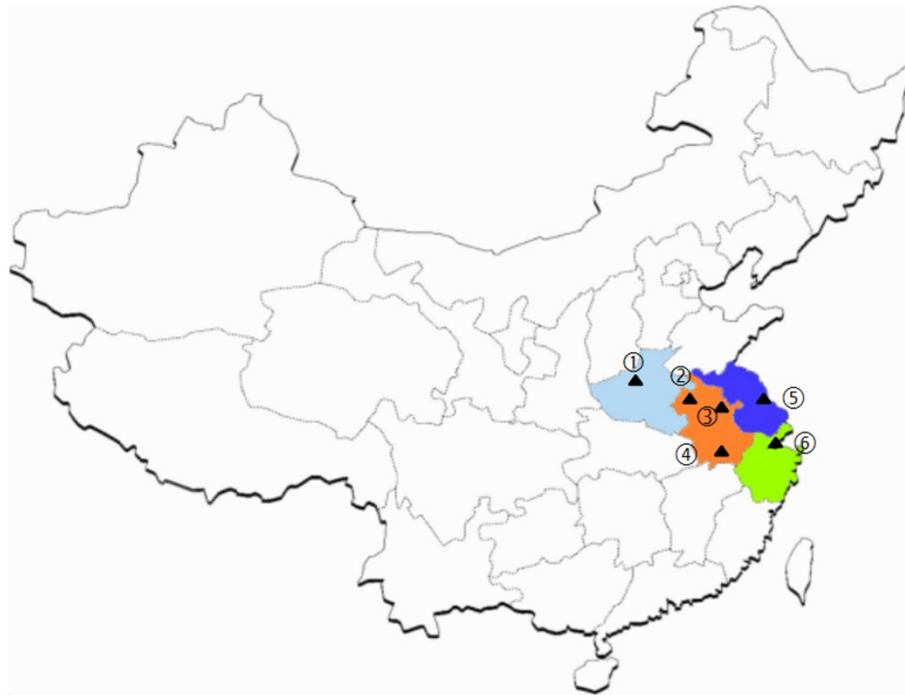

① Jiaozuo, Henan—"HJ" ② Bozhou, Anhui—"BJ" ③ Chuzhou, Anhui—"CJ" ④ Huangshan, Anhui—"GJ"  
 ⑤ Yancheng, Jiangsu—"HbJ" ⑥ Tongxiang, Zhejiang—"HbJ"

| Materials    | Sample number | Source                                   |
|--------------|---------------|------------------------------------------|
| HuaiJu (HJ)  | 11            | Jiaozuo, Henan                           |
| BoJu (BJ)    | 10            | Bozhou, Anhui                            |
| ChuJu (CJ)   | 11            | Chuzhou, Anhui                           |
| GongJu (GJ)  | 10            | Huangshan, Anhui                         |
| HangJu (HbJ) | 11            | Yancheng Jiangsu and Tongxiang, Zhejiang |

**Fig. S2** Collected regions and the number of samples of *Chrysanthemum* flowers

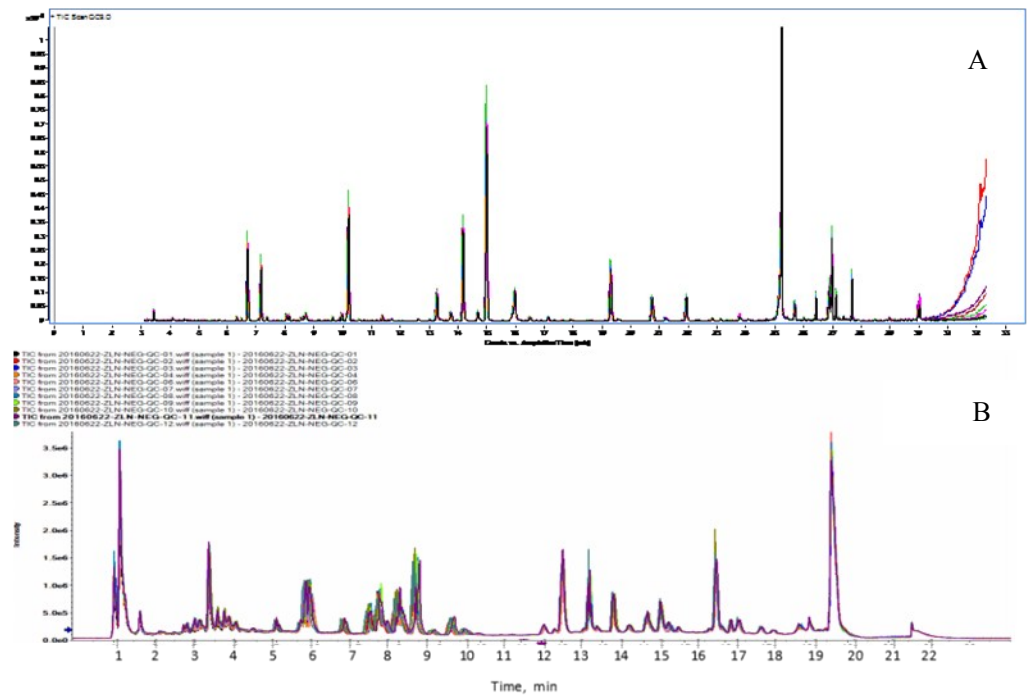

**Fig S3** The overlapping total ion current (TIC) chromatograms of QC samples from HSGC-MS (A) and UHPLC-QTOF/MS (B) analysis

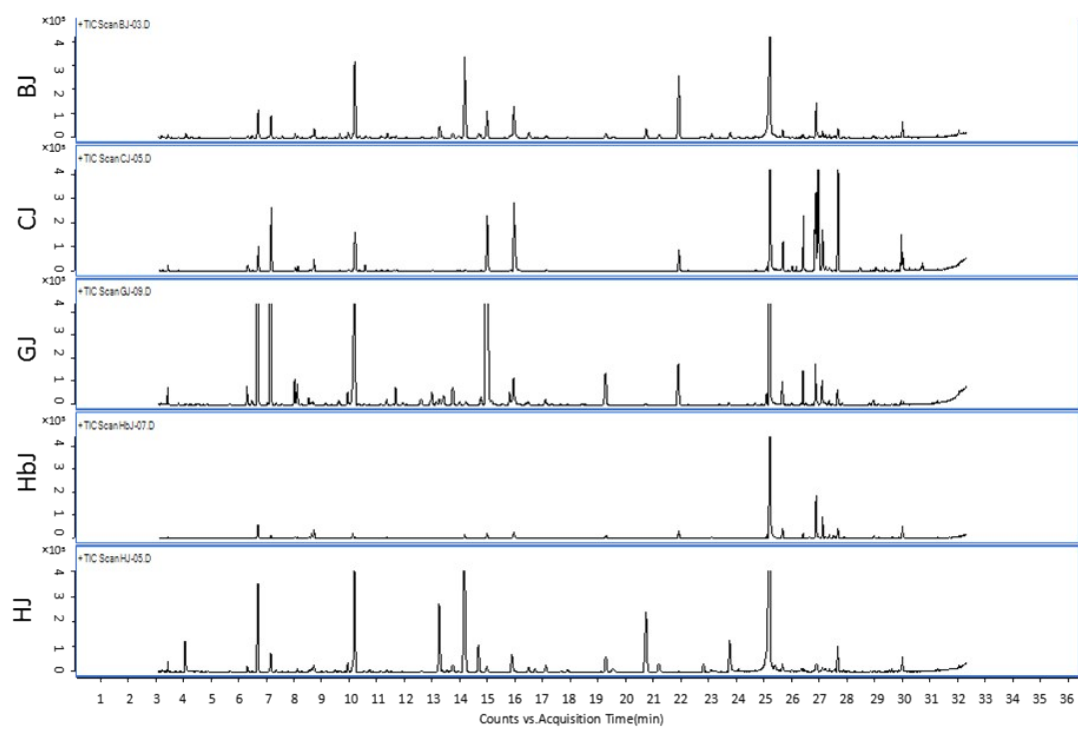

**Fig. S4** The typical TIC chromatograms of BJ, CJ, GJ, HbJ and HJ by HSGC-MS

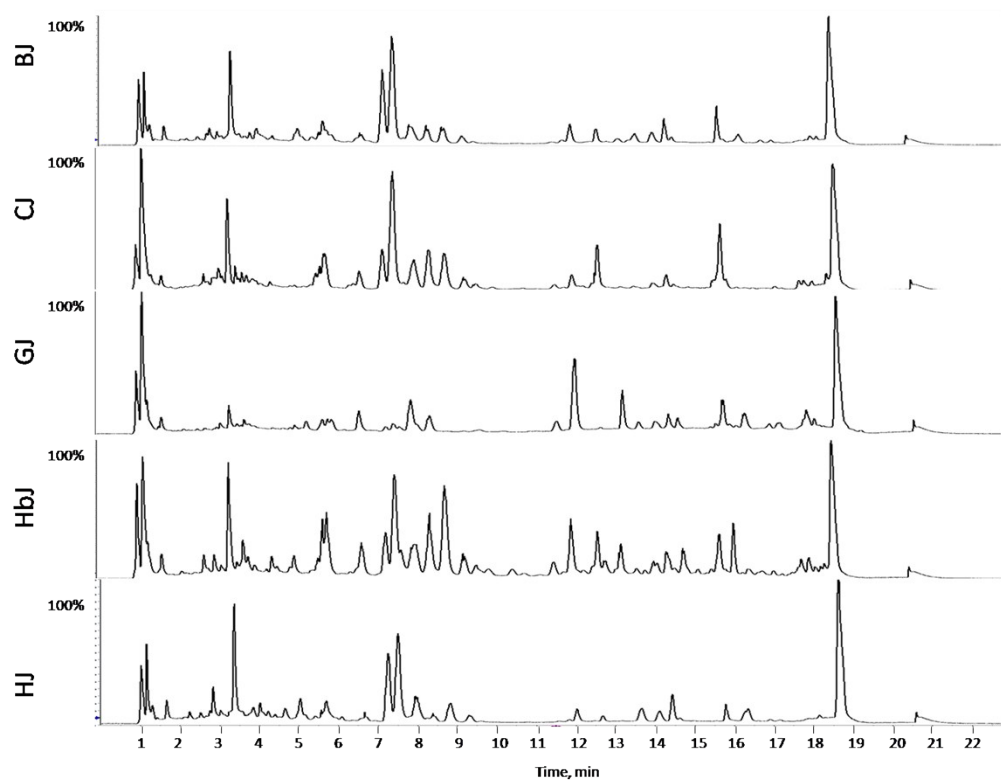

**Fig. S5** The typical TIC chromatograms of BJ, CJ, GJ, HbJ and HJ by UHPLC-QTOF-MS in negative ion mode



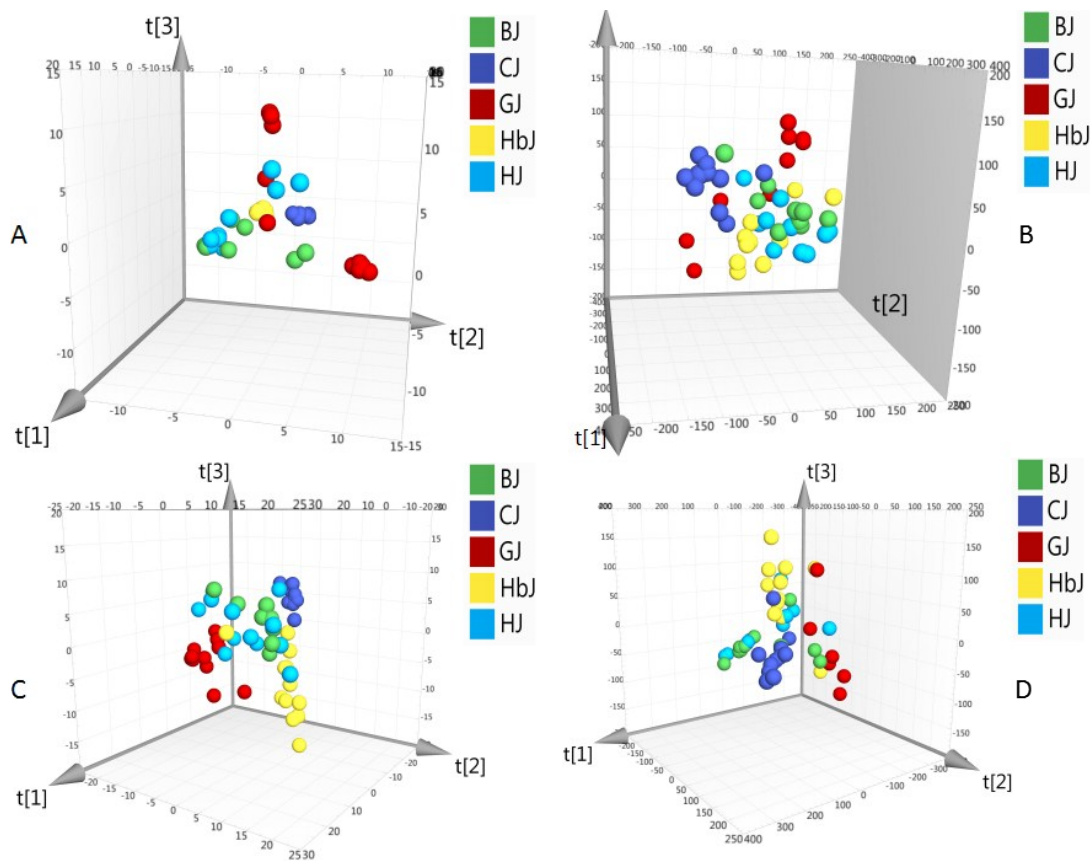

**Fig. S6** PCA scores plots of data of HSGC-MS and UHPLC-QTOF/MS from different normalization methods. Obviously, there were no obvious separation trends for groups of five FCs. A and B are plots of HSGC-MS and UHPLC-QTOF/MS data sets normalized by respective IS, C and D are plots of HSGC-MS and UHPLC-QTOF/MS normalized by total peak area.

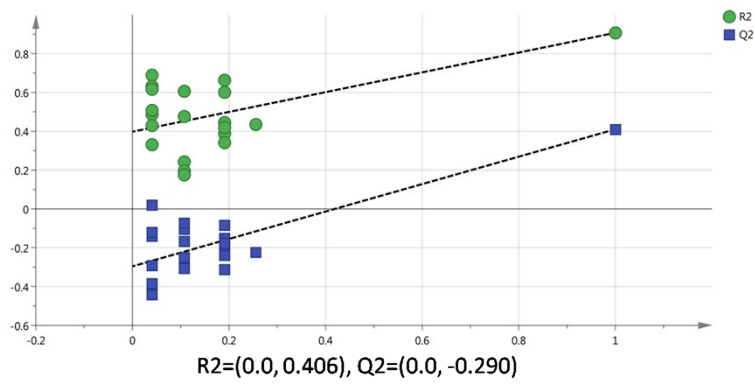

**Fig. S7** The plot of response permutation testing,  $R2=(0.0, 0.406)$ ,  $Q2=(0.0, -0.290)$   
 The criteria of validity have two important characteristics: the blue regression line of the Q2 (cum) points has a negative intercept, and all the permuted values (Q2 (cum) and R2 (cum)) to the right are higher than the original points to the left

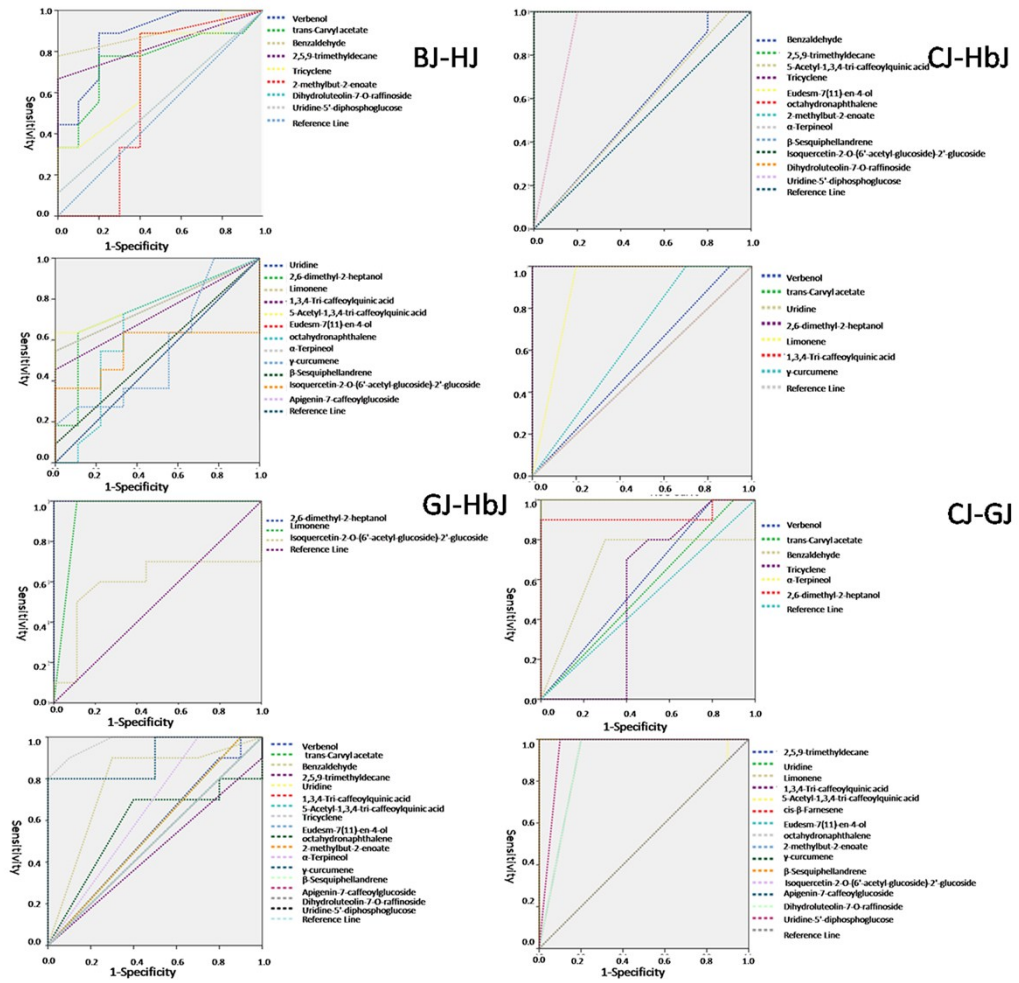

**Fig. S8** ROC analysis of 21 biomarkers in similar species of *Chrysanthemum* flowers with BJ-HJ, CJ-HbJ, GJ-HbJ and CJ-GJ

**Table S1** Nine extracted ions in ten QC samples from HSGC-MS analysis

| Extracted ion<br>( <i>m/z</i> @ <i>t<sub>R</sub></i> ) | No.     | <i>t<sub>R</sub></i><br>(min) | Peak area |
|--------------------------------------------------------|---------|-------------------------------|-----------|
| 93.0 @ 6.310                                           | 1       | 6.298                         | 43964.16  |
|                                                        | 2       | 6.292                         | 43824.39  |
|                                                        | 3       | 6.293                         | 44756.61  |
|                                                        | 4       | 6.298                         | 44869.55  |
|                                                        | 5       | 6.298                         | 47211.60  |
|                                                        | 6       | 6.304                         | 39326.86  |
|                                                        | 7       | 6.31                          | 37705.17  |
|                                                        | 8       | 6.328                         | 38925.68  |
|                                                        | 9       | 6.316                         | 35655.54  |
|                                                        | 10      | 6.322                         | 31911.78  |
|                                                        | RSD (%) | 0.1989                        | 11.92     |
| 170.0 @ 8.630                                          | 1       | 8.624                         | 60746.08  |
|                                                        | 2       | 8.618                         | 58350.04  |
|                                                        | 3       | 8.618                         | 55715.41  |
|                                                        | 4       | 8.618                         | 60489.43  |
|                                                        | 5       | 8.624                         | 63608.81  |
|                                                        | 6       | 8.636                         | 52188.82  |
|                                                        | 7       | 8.636                         | 52047.18  |
|                                                        | 8       | 8.653                         | 54544.30  |
|                                                        | 9       | 8.647                         | 47228.54  |
|                                                        | 10      | 8.647                         | 47260.30  |
|                                                        | RSD (%) | 0.1563                        | 10.20     |
| 184.0 @ 11.591                                         | 1       | 11.672                        | 26202.92  |
|                                                        | 2       | 11.667                        | 28933.25  |
|                                                        | 3       | 11.667                        | 26839.84  |
|                                                        | 4       | 11.655                        | 25924.77  |
|                                                        | 5       | 11.667                        | 29324.15  |
|                                                        | 6       | 11.678                        | 24665.22  |
|                                                        | 7       | 11.684                        | 19952.83  |
|                                                        | 8       | 11.696                        | 18652.77  |
|                                                        | 9       | 11.696                        | 21167.37  |
|                                                        | 10      | 11.696                        | 16260.51  |
|                                                        | RSD (%) | 0.1256                        | 18.91     |
| 152.0 @ 15.875                                         | 1       | 15.933                        | 587763.30 |
|                                                        | 2       | 15.927                        | 596975.58 |

|                |         |         |           |
|----------------|---------|---------|-----------|
|                | 3       | 15.927  | 636672.73 |
|                | 4       | 15.933  | 629611.11 |
|                | 5       | 15.927  | 645130.14 |
|                | 6       | 15.939  | 591700.71 |
|                | 7       | 15.945  | 533237.40 |
|                | 8       | 15.968  | 561636.09 |
|                | 9       | 15.957  | 577224.54 |
|                | 10      | 15.951  | 465806.16 |
|                | RSD (%) | 0.08921 | 9.209     |
| <hr/>          |         |         |           |
| 59.0 @ 17.105  | 1       | 17.087  | 62179.45  |
|                | 2       | 17.081  | 62263.02  |
|                | 3       | 17.081  | 66336.31  |
|                | 4       | 17.087  | 64096.98  |
|                | 5       | 17.093  | 71012.48  |
|                | 6       | 17.099  | 59542.14  |
|                | 7       | 17.105  | 48947.34  |
|                | 8       | 17.122  | 52998.31  |
|                | 9       | 17.122  | 55521.11  |
|                | 10      | 17.105  | 43813.22  |
|                | RSD (%) | 0.08924 | 14.19     |
| <hr/>          |         |         |           |
| 109.0 @ 22.811 | 1       | 22.805  | 32248.08  |
|                | 2       | 22.794  | 37089.30  |
|                | 3       | 22.794  | 35080.15  |
|                | 4       | 22.794  | 36304.52  |
|                | 5       | 22.794  | 37013.48  |
|                | 6       | 22.8    | 28666.52  |
|                | 7       | 22.805  | 24769.84  |
|                | 8       | 22.823  | 27433.84  |
|                | 9       | 22.811  | 28985.96  |
|                | 10      | 22.805  | 24652.08  |
|                | RSD (%) | 0.04151 | 15.85     |
| <hr/>          |         |         |           |
| 204.0 @ 26.827 | 1       | 26.856  | 470109.48 |
|                | 2       | 26.856  | 489787.83 |
|                | 3       | 26.856  | 518002.05 |
|                | 4       | 26.856  | 470226.78 |
|                | 5       | 26.862  | 502496.38 |
|                | 6       | 26.862  | 429707.94 |
|                | 7       | 26.868  | 403009.85 |
|                | 8       | 26.874  | 423725.64 |
|                | 9       | 26.874  | 416462.44 |

|                |         |         |           |
|----------------|---------|---------|-----------|
|                | 10      | 26.874  | 339497.73 |
|                | RSD (%) | 0.02987 | 12.11     |
| 204.0 @ 26.903 | 1       | 26.949  | 762982.70 |
|                | 2       | 26.949  | 779225.64 |
|                | 3       | 26.949  | 807477.85 |
|                | 4       | 26.949  | 768627.68 |
|                | 5       | 26.95   | 835865.37 |
|                | 6       | 26.956  | 722203.99 |
|                | 7       | 26.955  | 676027.72 |
|                | 8       | 26.967  | 690816.30 |
|                | 9       | 26.961  | 699411.46 |
|                | 10      | 26.961  | 596450.59 |
|                | RSD (%) | 0.02425 | 0.9671    |
| 204.0 @ 27.666 | 1       | 27.655  | 377574.43 |
|                | 2       | 27.655  | 397247.97 |
|                | 3       | 27.655  | 413888.28 |
|                | 4       | 27.655  | 376448.09 |
|                | 5       | 27.655  | 411370.23 |
|                | 6       | 27.661  | 354501.63 |
|                | 7       | 27.666  | 323594.54 |
|                | 8       | 27.672  | 343883.30 |
|                | 9       | 27.672  | 344385.39 |
|                | 10      | 27.666  | 275931.11 |
|                | RSD (%) | 0.02617 | 11.79     |

**Table S2** Nine extracted ions in eleven QC samples from UHPLC-QTOF/MS

analysis

| Extracted ion | No.     | $t_R$  | Peak area   |
|---------------|---------|--------|-------------|
| 277.0331      | 1       | 1.1558 | 15162605.83 |
|               | 2       | 1.1619 | 16415434.34 |
|               | 3       | 1.1543 | 17315510.79 |
|               | 4       | 1.1546 | 16942635.35 |
|               | 5       | 1.1580 | 16883041.17 |
|               | 6       | 1.1554 | 17767263.02 |
|               | 7       | 1.1558 | 20361786.25 |
|               | 8       | 1.1562 | 18851267.17 |
|               | 9       | 1.1573 | 19575234.07 |
|               | 10      | 1.1553 | 19316328.54 |
|               | 11      | 1.1611 | 18950580.34 |
|               | RSD (%) | 0.2174 | 8.780       |
| 243.0604      | 1       | 1.6478 | 1809560.45  |
|               | 2       | 1.6350 | 2086357.71  |
|               | 3       | 1.6479 | 2033042.99  |
|               | 4       | 1.6330 | 2007974.29  |
|               | 5       | 1.6340 | 2089584.81  |
|               | 6       | 1.6300 | 2070715.15  |
|               | 7       | 1.6380 | 2832767.23  |
|               | 8       | 1.6420 | 2577345.57  |
|               | 9       | 1.6430 | 2667555.61  |
|               | 10      | 1.6380 | 2412917.27  |
|               | 11      | 1.6390 | 2076676.72  |
|               | RSD (%) | 0.3563 | 14.53       |
| 667.1477      | 1       | 3.6270 | 1330756.44  |
|               | 2       | 3.6570 | 1440613.31  |
|               | 3       | 3.6470 | 1201413.10  |
|               | 4       | 3.6570 | 1302689.58  |
|               | 5       | 3.6410 | 1262582.24  |
|               | 6       | 3.6380 | 1365451.25  |
|               | 7       | 3.6460 | 1263921.57  |
|               | 8       | 3.6450 | 1306795.21  |
|               | 9       | 3.6680 | 1219223.86  |
|               | 10      | 3.6320 | 1447656.33  |

|          |         |        |            |
|----------|---------|--------|------------|
|          | 11      | 3.6290 | 1444435.75 |
|          | RSD (%) | 0.3504 | 6.710      |
| 639.1177 | 1       | 3.8092 | 1396419.41 |
|          | 2       | 3.8190 | 1251343.27 |
|          | 3       | 3.8890 | 1078519.96 |
|          | 4       | 3.8850 | 1165813.75 |
|          | 5       | 3.8380 | 1230658.76 |
|          | 6       | 3.8510 | 1597973.13 |
|          | 7       | 3.8590 | 1710070.52 |
|          | 8       | 3.8880 | 1689719.66 |
|          | 9       | 3.8850 | 1750538.57 |
|          | 10      | 3.8900 | 1784064.86 |
|          | 11      | 3.8570 | 1666478.07 |
|          | RSD (%) | 0.7596 | 17.73      |
| 338.0776 | 1       | 4.4089 | 297359.68  |
|          | 2       | 4.4459 | 330481.21  |
|          | 3       | 4.4463 | 255370.07  |
|          | 4       | 4.4240 | 319886.52  |
|          | 5       | 4.4515 | 271766.76  |
|          | 6       | 4.4330 | 267939.73  |
|          | 7       | 4.4347 | 303094.66  |
|          | 8       | 4.4371 | 344778.95  |
|          | 9       | 4.4445 | 383009.72  |
|          | 10      | 4.4254 | 335967.50  |
|          | 11      | 4.4100 | 378356.68  |
|          | RSD (%) | 0.3259 | 13.48      |
| 521.1998 | 1       | 5.2090 | 98735.12   |
|          | 2       | 5.2230 | 63931.28   |
|          | 3       | 5.2360 | 53656.56   |
|          | 4       | 5.1990 | 70115.63   |
|          | 5       | 5.2290 | 59519.67   |
|          | 6       | 5.2100 | 76021.79   |
|          | 7       | 5.2000 | 77674.37   |
|          | 8       | 5.2120 | 77674.37   |
|          | 9       | 5.2160 | 58253.28   |
|          | 10      | 5.2150 | 57502.18   |
|          | 11      | 5.2060 | 81518.88   |
|          | RSD (%) | 0.2208 | 19.15      |
| 359.0839 | 1       | 6.0680 | 827987.89  |
|          | 2       | 6.0650 | 810085.26  |



|          |         |         |            |
|----------|---------|---------|------------|
|          | 3       | 6.1180  | 747019.97  |
|          | 4       | 6.1240  | 837427.90  |
|          | 5       | 6.1200  | 788153.09  |
|          | 6       | 6.1290  | 888531.55  |
|          | 7       | 6.1100  | 927707.82  |
|          | 8       | 6.0910  | 949082.06  |
|          | 9       | 6.1110  | 974361.76  |
|          | 10      | 6.1300  | 1132204.22 |
|          | 11      | 6.1420  | 1028432.78 |
|          | RSD (%) | 0.4107  | 12.77      |
| 627.2366 | 1       | 18.3000 | 583684.54  |
|          | 2       | 18.2990 | 445501.54  |
|          | 3       | 18.2970 | 626878.24  |
|          | 4       | 18.2928 | 472987.72  |
|          | 5       | 18.2800 | 569508.48  |
|          | 6       | 18.2830 | 480817.22  |
|          | 7       | 18.2920 | 574336.74  |
|          | 8       | 18.2900 | 520702.34  |
|          | 9       | 18.2860 | 726789.53  |
|          | 10      | 18.2930 | 671134.93  |
|          | 11      | 18.2880 | 639975.57  |
|          | RSD (%) | 0.0350  | 15.42      |
| 552.2392 | 1       | 18.4621 | 583684.54  |
|          | 2       | 18.4680 | 881950.92  |
|          | 3       | 18.4660 | 685300.48  |
|          | 4       | 18.4538 | 648280.42  |
|          | 5       | 18.4611 | 569508.48  |
|          | 6       | 18.4624 | 512681.87  |
|          | 7       | 18.4582 | 574336.74  |
|          | 8       | 18.4607 | 513266.78  |
|          | 9       | 18.4662 | 561686.55  |
|          | 10      | 18.4627 | 491729.73  |
|          | 11      | 18.4570 | 657266.54  |
|          | RSD (%) | 0.02280 | 18.19      |

**Table S3** IS-1 in ten QC samples from HSGC-MS analysis

| No.     | Peak area  | Area sum % |
|---------|------------|------------|
| 1       | 5707375.20 | 29.02      |
| 2       | 4823403.13 | 25.35      |
| 3       | 5652064.94 | 27.72      |
| 4       | 5206285.93 | 26.44      |
| 5       | 6141511.16 | 28.77      |
| 6       | 4887036.11 | 27.39      |
| 7       | 4802649.01 | 27.66      |
| 8       | 4629018.10 | 26.32      |
| 9       | 3514539.57 | 22.47      |
| 10      | 3918542.40 | 26.71      |
| RSD (%) | 16.31      | 7.040      |

**Table S4** IS-2 in eleven QC samples from UHPLC-QTOF/MS analysis

| No.     | Area        | Area sum % |
|---------|-------------|------------|
| 1       | 24405550.87 | 21.54      |
| 2       | 25679208.51 | 22.21      |
| 3       | 26305779.54 | 22.05      |
| 4       | 25253467.97 | 21.91      |
| 5       | 26017727.80 | 22.32      |
| 6       | 25854050.58 | 21.80      |
| 7       | 25735910.16 | 18.19      |
| 8       | 25735910.16 | 18.19      |
| 9       | 25999923.91 | 19.19      |
| 10      | 26217085.79 | 18.79      |
| 11      | 26743970.60 | 19.38      |
| RSD (%) | 2.350       | 8.450      |

**Table S5** ROC curve analysis of the identified biomarkers from CJ and GJ

| Test Result Variable(s)                             | Area Under the Curve | Std. Error <sup>a</sup> | Asymptotic Sig. <sup>b</sup> | Asymptotic 95% Confidence Interval |             |
|-----------------------------------------------------|----------------------|-------------------------|------------------------------|------------------------------------|-------------|
|                                                     |                      |                         |                              | Lower Bound                        | Upper Bound |
| Verbenol                                            | 0.600                | 0.130                   | 0.450                        | 0.346                              | 0.854       |
| trans-Carvyl acetate                                | 0.550                | 0.132                   | 0.705                        | 0.292                              | 0.808       |
| Benzaldehyde                                        | 0.680                | 0.133                   | 0.174                        | 0.420                              | 0.940       |
| 2,5,9-trimethyldecane                               | 1.000                | 0.000                   | 0.000                        | 1.000                              | 1.000       |
| Uridine                                             | 0.500                | 0.132                   | 1.000                        | 0.241                              | 0.759       |
| 2,6-dimethyl-2-heptanol                             | 0.920                | 0.078                   | 0.001                        | 1.000                              | 1.000       |
| Limonene                                            | 0.500                | 0.132                   | 1.000                        | 0.241                              | 0.759       |
| 1,3,4-Tri-caffeoylquinic acid                       | 0.500                | 0.132                   | 1.000                        | 0.241                              | 0.759       |
| 5-Acetyl-1,3,4-tri-caffeoylquinic acid              | 0.505                | 0.132                   | 0.970                        | 0.236                              | 0.754       |
| Tricyclene                                          | 0.535                | 0.147                   | 0.791                        | 0.247                              | 0.823       |
| cis- $\beta$ -Farnesene                             | 1.000                | 0.000                   | 0.000                        | 1.000                              | 1.000       |
| Eudesm-7(11)-en-4-ol                                | 1.000                | 0.000                   | 0.000                        | 1.000                              | 1.000       |
| octahydronaphthalene                                | 1.000                | 0.000                   | 0.000                        | 1.000                              | 1.000       |
| 2-methylbut-2-enoate                                | 1.000                | 0.000                   | 0.000                        | 1.000                              | 1.000       |
| $\alpha$ -Terpineol                                 | 1.000                | 0.000                   | 0.000                        | 1.000                              | 1.000       |
| $\gamma$ -curcumene                                 | 1.000                | 0.000                   | 0.000                        | 1.000                              | 1.000       |
| $\beta$ -Sesquiphellandrene                         | 1.000                | 0.000                   | 0.000                        | 1.000                              | 1.000       |
| Isoquercetin-2-O-(6'-acetyl-glucoside)-2'-glucoside | 0.950                | 0.058                   | 0.001                        | 0.837                              | 1.000       |
| Apigenin-7-caffeoylglucoside                        | 0.900                | 0.079                   | 0.002                        | 0.744                              | 1.000       |
| Dihydroluteolin-7-O-raffinose                       | 0.900                | 0.079                   | 0.002                        | 0.744                              | 1.000       |
| Uridine-5'-diphosphoglucose                         | 0.900                | 0.058                   | 0.001                        | 0.837                              | 1.000       |

a. Under the nonparametric assumption

b. Null hypothesis: true area = 0.5

**Table S6** ROC curve analysis of the identified biomarkers from CJ and HbJ

| Test Result Variable(s)                            | Area Under the Curve | Std. Error <sup>a</sup> | Asymptotic Sig. <sup>b</sup> | Asymptotic 95% Confidence Interval |             |
|----------------------------------------------------|----------------------|-------------------------|------------------------------|------------------------------------|-------------|
|                                                    |                      |                         |                              | Lower Bound                        | Upper Bound |
| 2,6-dimethyl-2-heptanol                            | 1.000                | 0.000                   | 0.000                        | 1.000                              | 1.000       |
| Limonene                                           | 0.944                | 0.064                   | 0.001                        | 0.819                              | 1.000       |
| Isoquercetin-2-O-(6'-acetylglucoside)-2'-glucoside | 1.000                | 0.000                   | 0.000                        | 0.000                              | 1.000       |
| Verbenol                                           | 0.556                | 0.136                   | 0.683                        | 0.289                              | 0.822       |
| trans-Carvyl acetate                               | 0.500                | 0.136                   | 1.000                        | 0.233                              | 0.767       |
| Benzaldehyde                                       | 0.560                | 0.132                   | 0.462                        | 0.302                              | 0.818       |
| 2,5,9-trimethyldecane                              | 1.000                | 0.000                   | 0.000                        | 1.000                              | 1.000       |
| Uridine                                            | 0.500                | 0.136                   | 1.000                        | 0.233                              | 0.767       |
| 1,3,4-Tri-caffeoylquinic acid                      | 0.500                | 0.136                   | 1.000                        | 0.233                              | 0.767       |
| 5-Acetyl-1,3,4-tri-caffeoylquinic acid             | 0.550                | 0.135                   | 0.713                        | 0.292                              | 0.808       |
| Tricyclene                                         | 1.000                | 0.000                   | 0.000                        | 1.000                              | 1.000       |
| Eudesm-7(11)-en-4-ol                               | 1.000                | 0.000                   | 0.000                        | 1.000                              | 1.000       |
| octahydronaphthalene                               | 1.000                | 0.000                   | 0.000                        | 1.000                              | 1.000       |
| 2-methylbut-2-enoate                               | 1.000                | 0.000                   | 0.000                        | 1.000                              | 1.000       |
| $\alpha$ -Terpineol                                | 1.000                | 0.000                   | 0.000                        | 1.000                              | 1.000       |
| $\gamma$ -curcumene                                | 0.611                | 0.134                   | 0.414                        | 0.349                              | 0.874       |
| $\beta$ -Sesquiphellandrene                        | 1.000                | 0.000                   | 0.000                        | 1.000                              | 1.000       |
| Apigenin-7-caffeoylglucoside                       | 0.950                | 0.058                   | 0.001                        | 0.837                              | 1.000       |
| Dihydroluteolin-7-O-raffinose                      | 0.900                | 0.080                   | 0.003                        | 0.744                              | 1.000       |
| Uridine-5'-diphosphoglucose                        | 0.900                | 0.080                   | 0.003                        | 0.744                              | 1.000       |

a. Under the nonparametric assumption

b. Null hypothesis: true area = 0.5

**Table S7** ROC curve analysis of the identified biomarkers from GJ and HbJ

| Test Result Variable(s)                             | Area Under the Curve | Std. Error <sup>a</sup> | Asymptotic Sig. <sup>b</sup> | Asymptotic 95% Confidence Interval |             |
|-----------------------------------------------------|----------------------|-------------------------|------------------------------|------------------------------------|-------------|
|                                                     |                      |                         |                              | Lower Bound                        | Upper Bound |
| Verbenol                                            | 0.544                | 0.135                   | 0.744                        | 0.280                              | 0.809       |
| trans-Carvyl acetate                                | 0.550                | 0.135                   | 0.713                        | 0.286                              | 0.814       |
| Benzaldehyde                                        | 0.850                | 0.095                   | 0.010                        | 0.663                              | 1.000       |
| 2,5,9-trimethyldecane                               | 0.500                | 0.136                   | 1.000                        | 0.233                              | 0.767       |
| Uridine                                             | 0.500                | 0.136                   | 1.000                        | 0.233                              | 0.767       |
| 2,6-dimethyl-2-heptanol                             | 1.000                | 0.000                   | 0.000                        | 1.000                              | 1.000       |
| Limonene                                            | 0.944                | 0.064                   | 0.001                        | 0.819                              | 1.000       |
| 1,3,4-Tri-caffeoylquinic acid                       | 0.500                | 0.136                   | 1.000                        | 0.233                              | 0.767       |
| 5-Acetyl-1,3,4-tri-caffeoylquinic acid              | 0.550                | 0.135                   | 0.713                        | 0.286                              | 0.814       |
| Tricyclene                                          | 0.972                | 0.032                   | 0.001                        | 0.910                              | 1.000       |
| cis- $\beta$ -Farnesene                             | 0.500                | 0.136                   | 1.000                        | 0.233                              | 0.767       |
| Eudesm-7(11)-en-4-ol                                | 0.556                | 0.142                   | 0.683                        | 0.277                              | 0.835       |
| octahydronaphthalene                                | 0.550                | 0.135                   | 0.713                        | 0.286                              | 0.814       |
| 2-methylbut-2-enoate                                | 0.650                | 0.128                   | 0.270                        | 0.399                              | 0.901       |
| $\alpha$ -Terpineol                                 | 0.889                | 0.081                   | 0.004                        | 0.731                              | 1.000       |
| $\gamma$ -curcumene                                 | 0.500                | 0.136                   | 1.000                        | 0.233                              | 0.767       |
| $\beta$ -Sesquiphellandrene                         | 0.594                | 0.143                   | 0.488                        | 0.314                              | 0.875       |
| Isoquercetin-2-O-(6'-acetyl-glucoside)-2'-glucoside | 0.500                | 0.136                   | 1.000                        | 0.233                              | 0.767       |
| Apigenin-7-caffeoylglucoside                        | 0.500                | 0.136                   | 1.000                        | 0.233                              | 0.767       |
| Dihydroluteolin-7-O-raffinose                       | 0.500                | 0.136                   | 1.000                        | 0.233                              | 0.767       |

a. Under the nonparametric assumption

b. Null hypothesis: true area = 0.5

**Table S8** ROC curve analysis of the identified biomarkers from HJ and BJ

| Test Result Variable(s)                             | Area Under the Curve | Std. Error <sup>a</sup> | Asymptotic Sig. <sup>b</sup> | Asymptotic 95% Confidence Interval |             |
|-----------------------------------------------------|----------------------|-------------------------|------------------------------|------------------------------------|-------------|
|                                                     |                      |                         |                              | Lower Bound                        | Upper Bound |
| Isoquercetin-2-O-(6'-acetyl-glucoside)-2'-glucoside | 0.456                | 0.148                   | 0.744                        | 0.165                              | 0.746       |
| trans-Carvyl acetate                                | 0.761                | 0.119                   | 0.055                        | 0.529                              | 0.994       |
| Benzaldehyde                                        | 0.889                | 0.087                   | 0.004                        | 0.718                              | 1.000       |
| 2,5,9-trimethyldecane                               | 0.833                | 0.103                   | 0.014                        | 0.631                              | 1.000       |
| Uridine                                             | 0.773                | 0.107                   | 0.027                        | 0.562                              | 0.984       |
| 1,3,4-Tri-caffeoylquinic acid                       | 0.727                | 0.123                   | 0.142                        | 0.502                              | 0.952       |
| 5-Acetyl-1,3,4-tri-caffeoylquinic acid              | 0.798                | 0.111                   | 0.041                        | 0.502                              | 0.952       |
| Tricyclene                                          | 0.722                | 0.120                   | 0.102                        | 0.487                              | 0.957       |
| Eudesm-7(11)-en-4-ol                                | 0.545                | 0.135                   | 0.713                        | 0.288                              | 0.803       |
| octahydronaphthalene                                | 0.652                | 0.138                   | 0.348                        | 0.390                              | 0.913       |
| 2-methylbut-2-enoate                                | 0.594                | 0.145                   | 0.488                        | 0.311                              | 0.878       |
| $\alpha$ -Terpineol                                 | 0.545                | 0.135                   | 0.713                        | 0.288                              | 0.803       |
| $\beta$ -Sesquiphellandrene                         | 0.545                | 0.135                   | 0.713                        | 0.288                              | 0.803       |
| Apigenin-7-caffeoylglucoside                        | 0.500                | 0.136                   | 1.000                        | 0.233                              | 0.767       |
| Dihydroluteolin-7-O-raffinose                       | 0.556                | 0.136                   | 0.683                        | 0.289                              | 0.822       |
| Uridine-5'-diphosphoglucose                         | 0.556                | 0.136                   | 0.683                        | 0.289                              | 0.822       |
| Verbenol                                            | 0.878                | 0.079                   | 0.006                        | 0.722                              | 1.000       |
| 2,6-dimethyl-2-heptanol                             | 0.747                | 0.120                   | 0.086                        | 0.562                              | 0.984       |
| Limonene                                            | 0.773                | 0.116                   | 0.066                        | 0.562                              | 0.984       |
| $\gamma$ -curcumene                                 | 0.556                | 0.138                   | 0.624                        | 0.239                              | 0.761       |

a. Under the nonparametric assumption

b. Null hypothesis: true area = 0.5
